# Supplementary material for: Heck coupling catalyzed by Pd exchanged supported 12-tunstophosphoric acid—an efficient ligand free, low Pd-loading heterogeneous catalyst
Source: Royal Society of Chemistry journal article supplement (doi:10.1039/c1ra00687h), 2011-11-10
Supplement: c1ra00687h.pdf [file c1ra00687h.pdf]

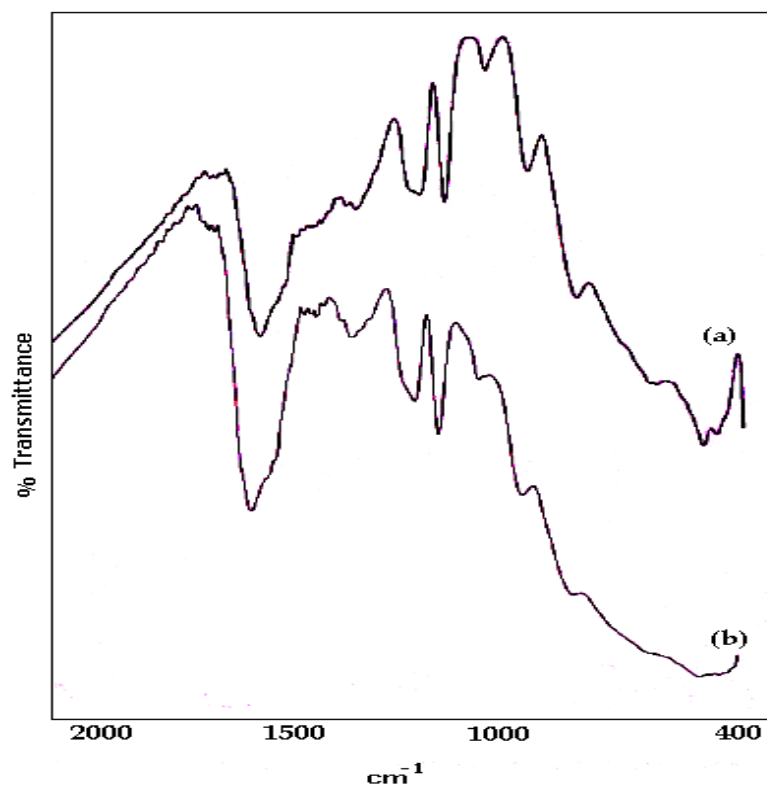

Fig.S1. FT-IR of (a) TPA/ZrO<sub>2</sub> and (b) PdTPA/ZrO<sub>2</sub>

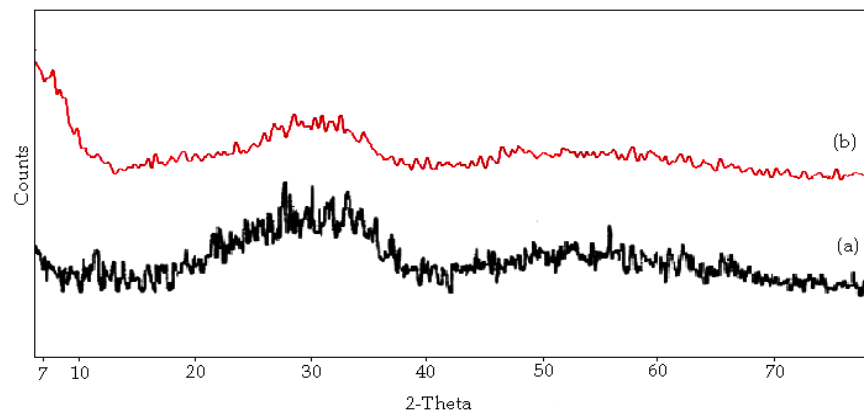

Fig.S2 XRD of (a) TPA/ZrO<sub>2</sub> and (b) Pd-TPA/ZrO<sub>2</sub>

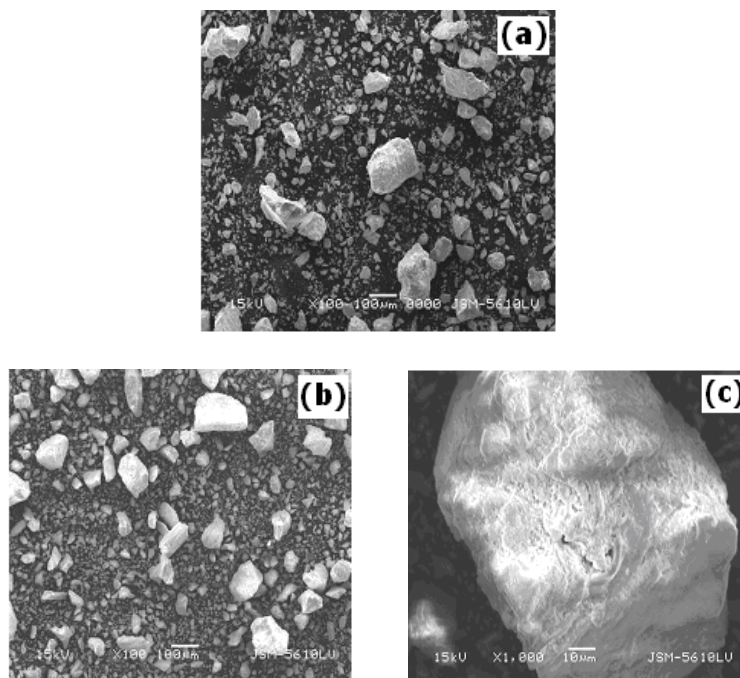

Fig. S3. SEM of (a) TPA/ZrO<sub>2</sub> (100x), (b) Pd-TPA/ZrO<sub>2</sub> (100x) and (c) Pd-TPA/ZrO<sub>2</sub> (1000x)
